# Supplementary material for: Ancestry Specific Polygenic Risk Score, Dietary Patterns, Physical Activity, and Cardiovascular Disease
Source: MDPI journal article supplement (doi:10.3390/nu16040567), 2024-02-19
Supplement: s1 [file s1]

## Supplemental Materials

**Table S1.** Characteristics of diet forms used by the seven NHLBI Care studies.

| Study         | Diet Form    | Items                       | Exam Year Used |
|---------------|--------------|-----------------------------|----------------|
| ARIC          | FFQ          | semi-quantitative 66-item   | 1987-Exam 1    |
| CARDIA        | Diet history | 102 questions               | 1989-Exam 1    |
| CHS           | Diet history | 96 questions                | 1998-Exam 1    |
| FHS OFFSPRING | FFQ          | semi-quantitative 88-items  | 1983-Exam 3    |
| FHS GENX 3    | FFQ          | semi-quantitative 88-items  | 2002-Exam 2    |
| MESA          | FFQ          | semi-quantitative 153-items | 2010-Exam 5    |
| WHI           | FFQ          | semi-quantitative 145-items | 2005-Exam 1    |

Abbreviations: NHLBI, National Heart, Lung, and Blood Institute; Care, Candidate Gene Association Resource; ARIC, Atherosclerosis Risk in Communities study,<sup>28</sup> CARDIA, Coronary Artery Risk Development in Young Adults Study,<sup>32</sup> CHS, Cardiovascular Heart Study,<sup>33</sup> FHS, Framingham Heart Study Offspring and GENX 3 studies,<sup>30</sup> MESA, Multi-Ethnic Study of Atherosclerosis Study,<sup>29</sup> and Women's Health Initiative study (WHI).<sup>31</sup>

## European Americans

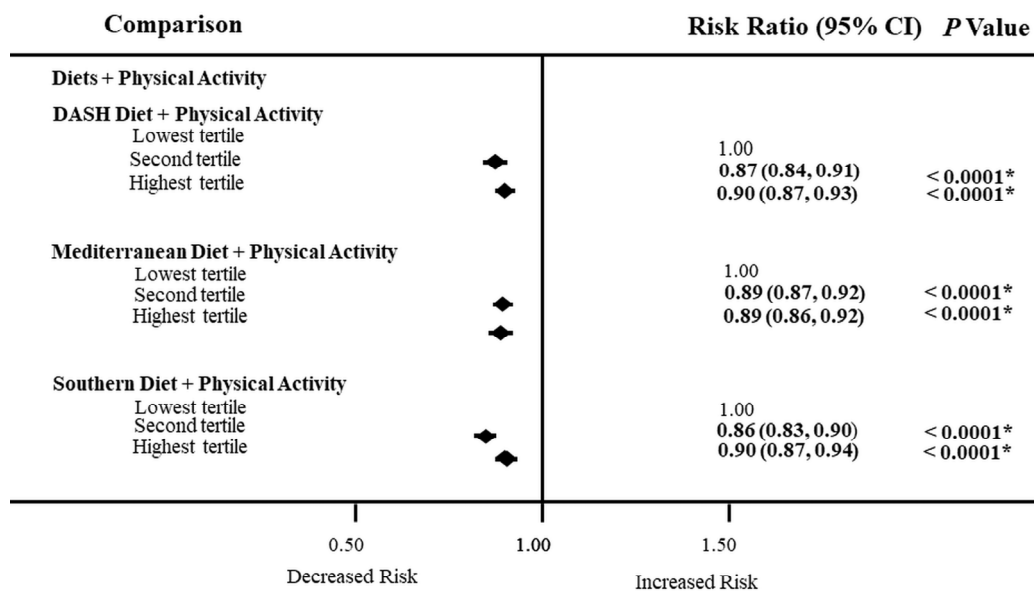

## African Americans

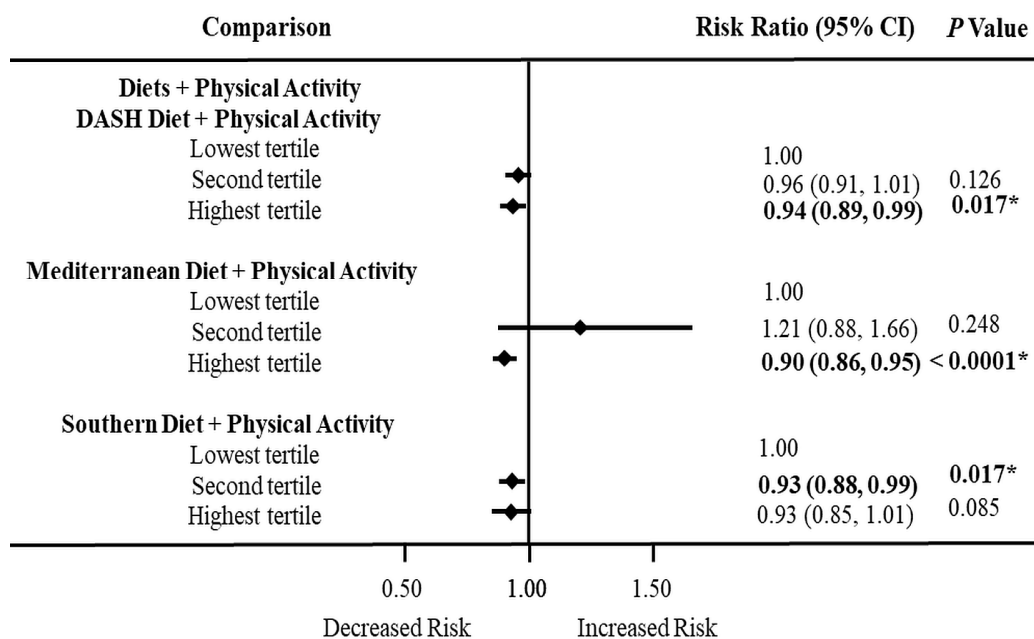

**Figure S1.** Association between dietary patterns and physical activity by ancestry.

Abbreviations: DASH, Dietary Approached to Stop High Blood Pressure.

Bold indicates  $p$  values that were statistically significant at  $p < 0.05$ .

\*Bonferroni adjustment for multiple testing ( $p < 0.05/2 = < 0.025$ ).

PRS: Atherosclerotic Atherosclerosis cardiovascular disease status was regressed against an interaction term composed of each dietary scores and physical activity adjusting for a covariate propensity score composed of age, sex, current cigarette smoking status, and current drinking status.  
Dietary pattern scores were computed using KMeans cluster, then converted to Z scores.  
Physical activity was recoded as high/low by evaluating its functional form in each dataset.

**Table S2.** Genes shared between ancestries for European Americans and African Americans.

ABHD17AP4  
ADAMTS7  
BAK1  
BCRP5  
CCDC74BP1  
CRKL  
DPYSL2  
EGFR  
HLA-DPB2  
LZTR1  
PI4KA  
PI4KAP2  
POM121L4P  
RPS18  
SERPIND1  
SMPD4P1  
SNAP29  
TMEM191A

**Table S3.** Top pathways of 18 overlapped genes between ancestries for European Americans and African Americans in the WikiPathway.

| Term                                                             | <i>P</i> Value       | Adjusted <i>P</i> Value | Genes                                 |
|------------------------------------------------------------------|----------------------|-------------------------|---------------------------------------|
| 22Q11 2 Copy Number Variation Syndrome WP4657                    | 6.499 <sup>-10</sup> | 5.459 <sup>-8</sup>     | SERPIND1;PI4KA;LZTR1;SNAP29;EGFR;CRKL |
| Photodynamic Therapy Induced AP 1 Survival Signaling WP3611      | 9.134 <sup>-4</sup>  | 0.038                   | BAK1;EGFR                             |
| Endometrial Cancer WP4155                                        | 0.001                | 0.040                   | BAK1;EGFR                             |
| Non Small Cell Lung Cancer WP4255                                | 0.002                | 0.040                   | BAK1;EGFR                             |
| Pancreatic Adenocarcinoma Pathway WP4263                         | 0.003                | 0.041                   | BAK1;EGFR                             |
| ErbB Signaling Pathway WP673                                     | 0.003                | 0.041                   | EGFR;CRKL                             |
| TCA Cycle Nutrient Use And Invasiveness Of Ovarian Cancer WP2868 | 0.004                | 0.054                   | EGFR                                  |

|                                     |       |       |           |
|-------------------------------------|-------|-------|-----------|
| Breast Cancer Pathway<br>WP4262     | 0.008 | 0.082 | BAK1;EGFR |
| EGF EGFR Signaling<br>Pathway WP437 | 0.009 | 0.082 | EGFR;CRKL |

Adjusted  $p$  value used the Benjamini-Hochberg formula to adjust for false discovery rate.<sup>51</sup>
